# Supplementary material
Source: Springer Nature journal article supplement (https://www.springermedizin.de/resource/supplementary/12960_2013_426_MOESM3_ESM.pdf/9570056)
Supplement: MOESM3 [file 9570056]

General Public Health

Human Resources  
Development

Health Management

Health Information  
Systems

Health Promotion

Health Research

Public Health Nutrition
